# Supplementary material for: Genotypic and Phenotypic Characterization of Erythromycin-Resistant Staphylococcus aureus Isolated from Bovine Mastitis and Humans in Close Contact
Source: MDPI journal article supplement (doi:10.3390/tropicalmed8010026), 2022-12-29
Supplement: s1 [file s1]

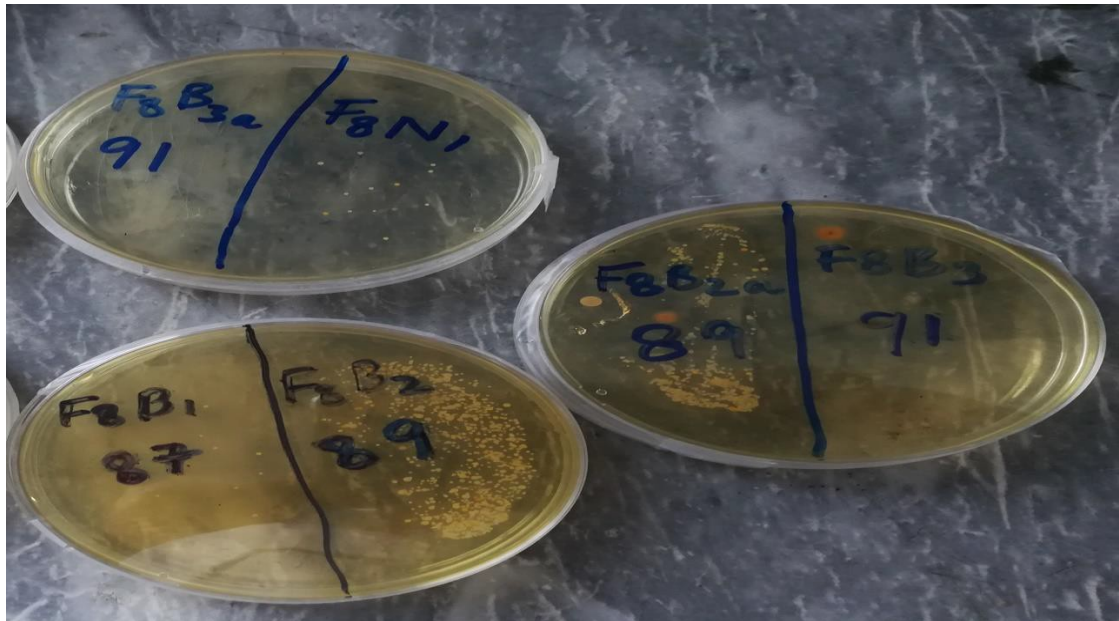

**Figure S1.** Different colonies of *Staphylococci* on staph 110 agar.

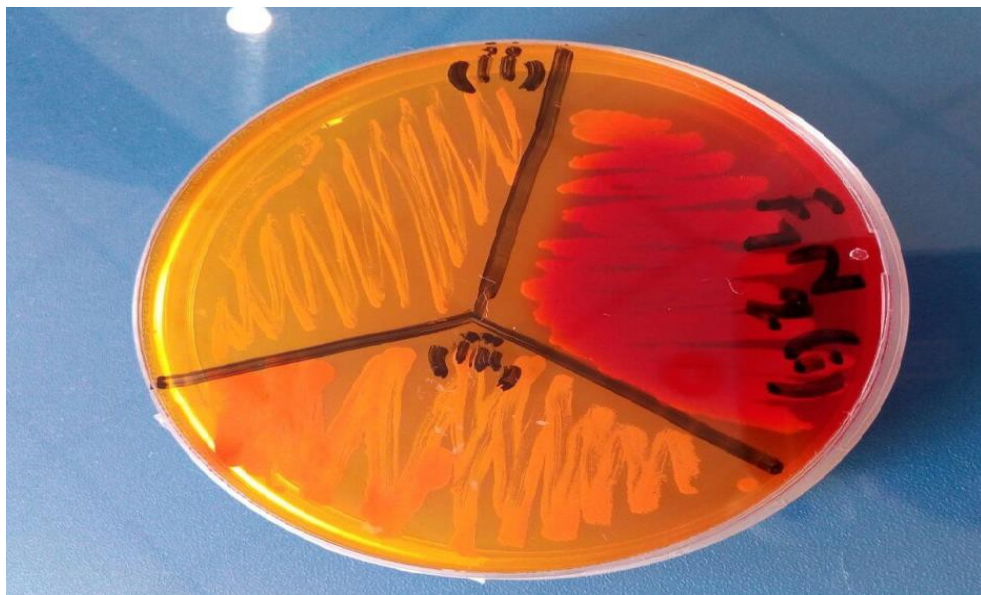

**Figure S2.** Mannitol test result.

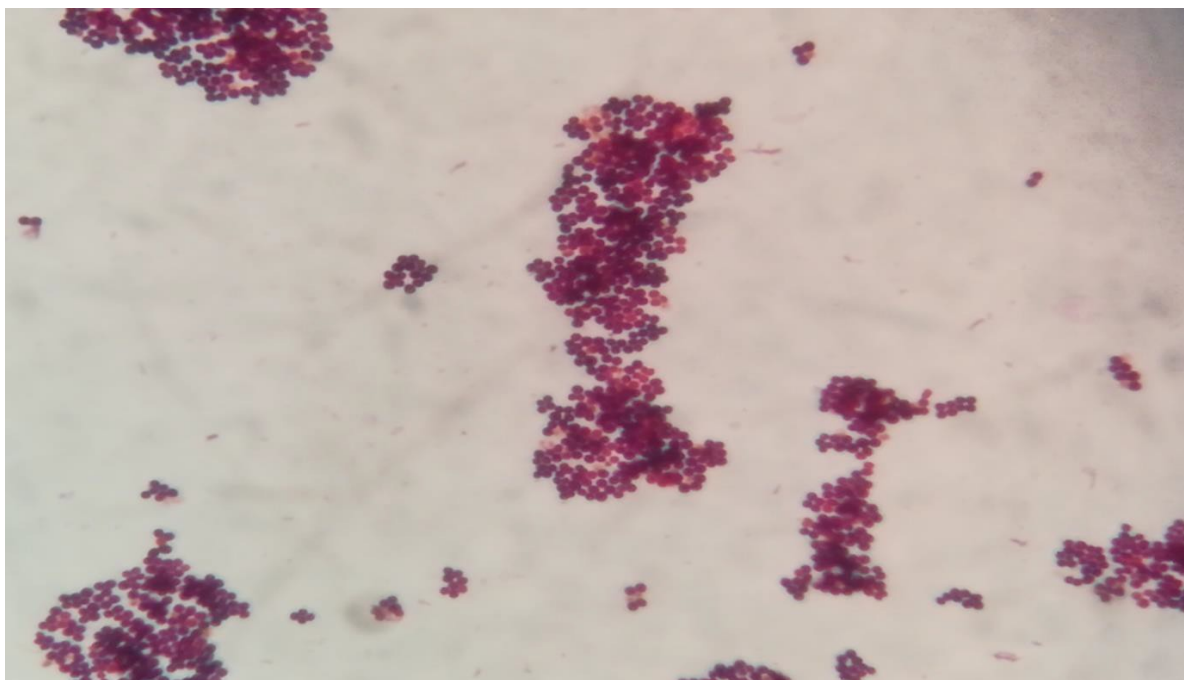

**Figure S3.** Microscopic view of a cocci shaped Gram-positive *S. aureus*.

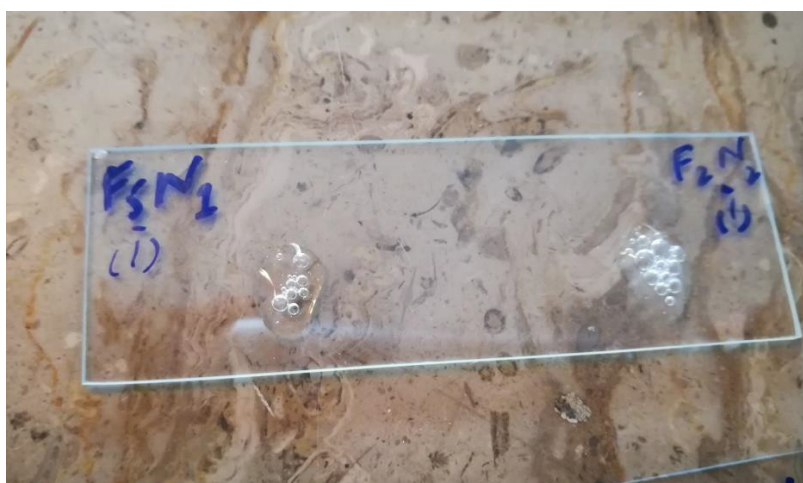

**Figure S4.** Catalase positive for *S. aureus* isolate.

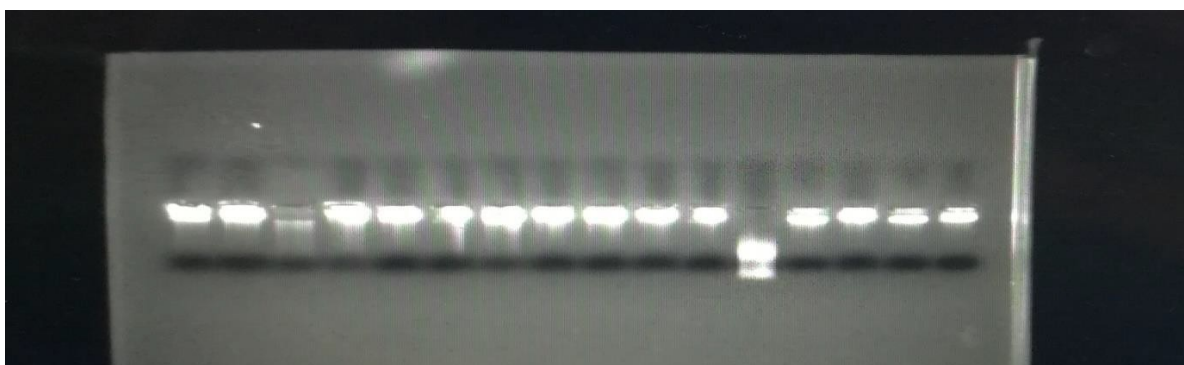

**Figure S5.** Whole bacterial genomic DNA isolates on 1.5% gel.

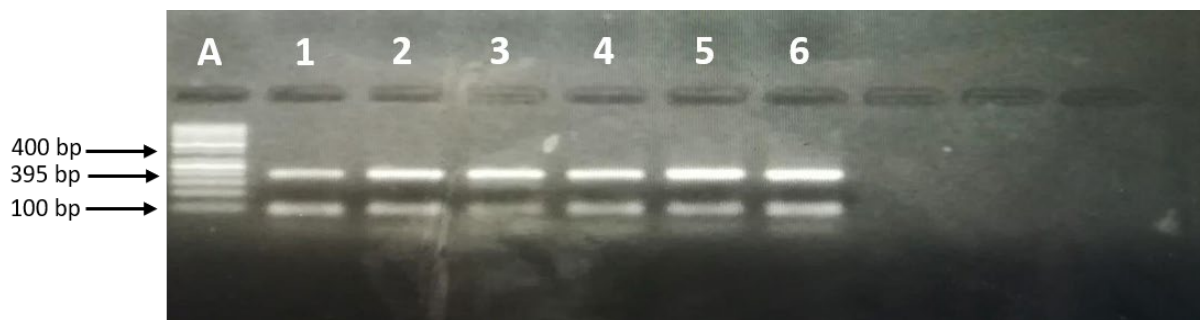

**Figure S6.** Amplification of *nuc* gene visualized by UV light, showing positive results for *S. aureus* identification. A: 100bp DNA ladder, lane 1-6: 395 bp amplified product of PCR showed milker workers nasal samples and mastitic milk samples positive for thermonuclease genes.

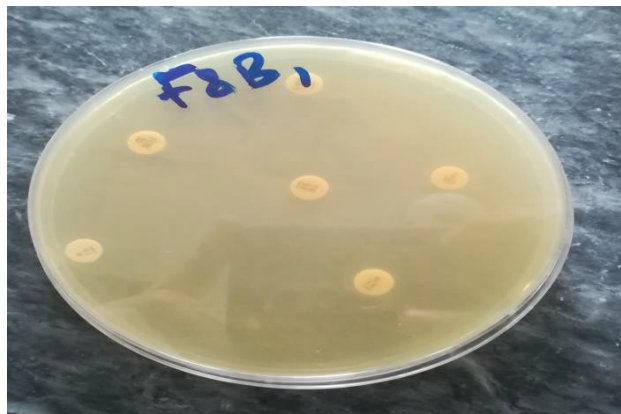

**Figure S7.** Zones of inhibition of Disk diffusion test. Left plate is showing sensitivity to all antibiotics while on the right-side plate is resistant to erythromycin and all other antibiotics.

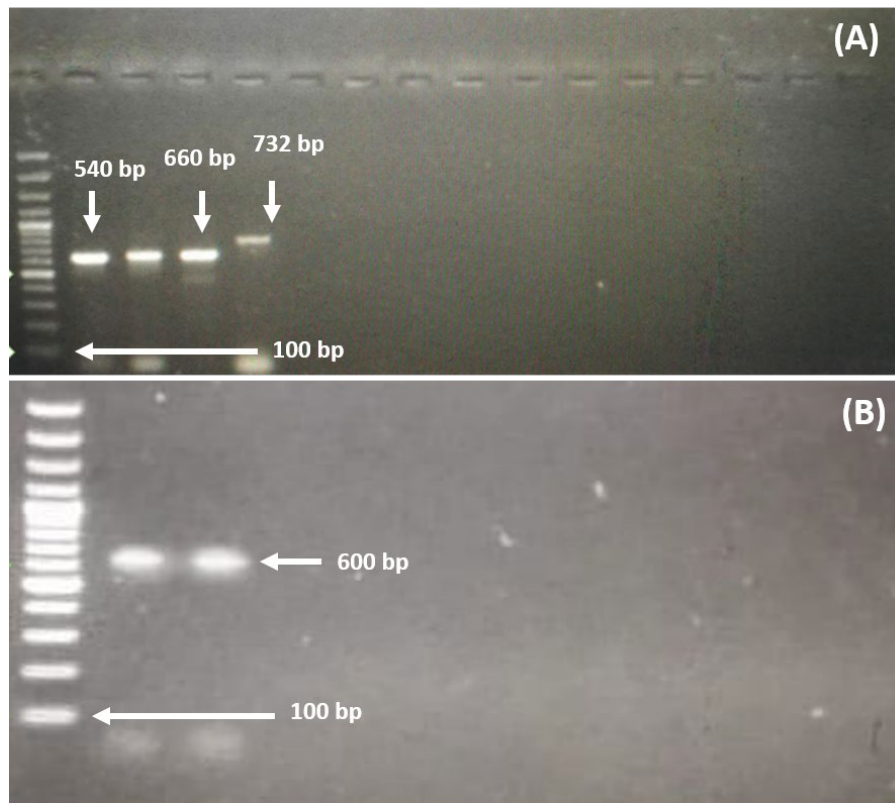

**Figure S8. (A):** PCR product from 2 sets of primers *ermC* gene and one set of primer of *ermA* gene using 100 bp DNA ladder. **Lane 1 and 2:** 540bp PCR product of *ermC* gene of three samples isolates. **Lane 3:** 660bp PCR product of *ermC* gene of three sample isolates. **Lane 4:** 732 bp PCR product of *ermA* gene of 2 sample isolates. **(B):** PCR products of control from single set of primer *ermB* gene Lane M: 100 bp DNA ladder. Lane 1 & 2: 639 bp PCR product of 2 *S. aureus* isolates

**Table S1.** Sampling sites and structure of farms.

| Sr. No. | Sampling Site          | Farm Designation | Herd Size | Buffaloes with MastitisNo. |
|---------|------------------------|------------------|-----------|----------------------------|
| 1.      | Sheikh Kot, Lahore     | F1               | 20        | 1                          |
| 2.      | Sheikh Kot, Lahore     | F2               | 60        | 1                          |
| 3.      | Sheikh Kot, Lahore     | F3               | 15        | 1                          |
| 4.      | Sheikh Kot, Lahore     | F4               | 6         | 1                          |
| 5.      | Sheikh Kot, Lahore     | F5               | 22        | 2                          |
| 6.      | Sagian bridge, Lahore. | F6               | 6         | 1                          |
| 7.      | Sagian bridge, Lahore. | F7               | 40        | 2                          |
| 8.      | UVAS, Lahore.          | F8               | 10        | 2                          |
| 9.      | UVAS, Lahore.          | F9               | 30        | 3                          |
| 10.     | UVAS, Lahore.          | F10              | 5         | 1                          |
| 11.     | Sagian bridge, Lahore. | F11              | 90        | 2                          |
| 12.     | Harbanspura, Lahore.   | F12              | 5         | 1                          |
| 13.     | Harbanspura, Lahore.   | F13              | 15        | 12                         |

**Table S2** Reaction mixture of PCR for primers of *nuc* gene.

| Reagents                     | Volume (μL) |         |
|------------------------------|-------------|---------|
| DNA 50 ng/μl                 | 2.0         |         |
| PCR buffer (2mM)             | 1.5         |         |
| dNTPs (25mM)                 | 1.5         |         |
| MgCl <sub>2</sub> (20mM)     | 1.0         |         |
| Primers (10 Pmol)            | Forward     | Reverse |
|                              | 1.0         | 1.0     |
| Taq <i>polymerase</i> 5 U/μl | 0.15        |         |
| Distilled Water              | 7.00        |         |
| Total Volume                 | 15          |         |

**Table S3.** PCR conditions for *nuc* gene.

| Steps                | Temperature | Time             |
|----------------------|-------------|------------------|
| Initial Denaturation | 95°C        | 5 min            |
| Denaturation         | 95°C        | 30 sec           |
| Annealing            | 55°C        | 45 sec 30 cycles |
| Extension            | 72°C        | 1 min            |
| Final Extension      | 72°C        | 10 min           |



**Table S4.** T<sub>m</sub>, amplicon sizes and primer sequences.

| Sr. No. | Primer Name    | 5'-3' Sequence            | T <sub>m</sub> | Product Size (bp) |
|---------|----------------|---------------------------|----------------|-------------------|
| 1       | <i>ermA-F</i>  | AATGAACCAGTAAGGAGAAGGTT   | 57.43          | 732               |
|         | <i>ermA-R</i>  | GCGTCCTCTTGTGAAATTAGAGA   | 59.91          |                   |
| 2       | <i>ermB-F</i>  | GAAAAGGTACTCAACCAAATA     | 57             | 639               |
|         | <i>ermB-R</i>  | AGTAACGGTACTTAAATTGTTTA C | 57             |                   |
| 3       | <i>ermC-F1</i> | TCGCATCAGATTGCAGTATAAA    | 58.47          | 544               |
|         | <i>ermC-R1</i> | TAATGCCAATGAGCGTTTTG      | 59.70          |                   |
| 4       | <i>ermC-F2</i> | CGTAACTGCCATTGAAATAGACC   | 59.91          | 660               |
|         | <i>ermC-R2</i> | AAGTGAATGCGCAAAAGACA      | 59.47          |                   |
| 5       | <i>Nuc-F</i>   | ATATGTATGGCAATCGTTTCAAT   | 56             | 395               |
|         | <i>Nuc-R</i>   | GTAAATGCACTTGCTTCAGGAC    | 56             |                   |

**Table S5.** Components of PCR master mix for primers of *ermA*, *ermB* and *ermC* gene.

| PCR Reaction Mixture Reagents | Volume (μL) |         |
|-------------------------------|-------------|---------|
| PCR buffer (2mM)              | 1.5         |         |
| MgCl <sub>2</sub> (20mM)      | 1           |         |
| DNA 50ng/μl                   | 2.0         |         |
| dnTPs (25mM)                  | 1.5         |         |
| <i>Taq polymerase</i> 5U/μl   | 0.15        |         |
| Primers (10 pmol)             | Forward     | Reverse |
|                               | 1.0         | 1.0     |
| Distilled Water               | 7.0         |         |
| Total Volume                  | 15          |         |

**Table S6.** Conditions of PCR for *ermA* gene.

| Steps                | Temperature | Time            |
|----------------------|-------------|-----------------|
| Initial Denaturation | 95°C        | 5min            |
| Denaturation         | 95°C        | 30sec           |
| Annealing            | 53°C        | 30sec 30 Cycles |
| Extension            | 72°C        | 1min            |
| Final Extension      | 72°C        | 10min           |

**Table S7.** Conditions of PCR for *ermB* gene.

| Steps                | Temperature | Time            |
|----------------------|-------------|-----------------|
| Initial Denaturation | 95°C        | 5min            |
| Denaturation         | 95°C        | 30sec           |
| Annealing            | 55°C        | 30sec 30 Cycles |
| Extension            | 72°C        | 1min            |
| Final Extension      | 72°C        | 7min            |

**Table S8. Conditions of PCR for *ermC* gene.**

| <b>Steps</b>         | <b>Temperature</b> | <b>Time</b>      |
|----------------------|--------------------|------------------|
| Initial Denaturation | 95 °C              | 5 min            |
| Denaturation         | 95 °C              | 30 sec           |
| Annealing            | 53 °C              | 30 sec 30 cycles |
| Extension            | 72 °C              | 1 min            |
| Final Extension      | 72 °C              | 7 min            |
